# Supplementary material
Source: publisher figshare collection journal article supplement (https://acs.figshare.com/ndownloader/files/24111964)
Supplement: Supplementary file 1 [file 24111964]

**Supplementary information for**  
**Polyplexes by polymerized dequalinium and bi-functional aptamer for**  
**mitochondrial targeting drug release to overcome drug resistance**

Duo Gao<sup>†,¶</sup>, Qiuning Zhu<sup>†,¶</sup>, Jianqing Ruan<sup>†</sup>, Tao Sun<sup>\*,§</sup>, Liang Han<sup>\*,†,‡</sup>

<sup>†</sup>Jiangsu Key Laboratory of Neuropsychiatric Diseases and College of Pharmaceutical Sciences, Soochow University, Suzhou, Jiangsu 215123, China

<sup>‡</sup>State Key Laboratory of Natural and Biomimetic Drugs, Peking University, Beijing 100191, China

<sup>§</sup>Key Laboratory of Smart Drug Delivery (Ministry of Education), State Key Laboratory of Medical Neurobiology, Department of Pharmaceutics, School of Pharmacy, Fudan University, 826 Zhangheng Road, Shanghai 201203, P. R. China.

<sup>¶</sup>These authors contributed equally.

\*Corresponding author.

Liang Han, E-mail: hanliang@suda.edu.cn

Tao Sun, E-mail: sunt@fudan.edu.cn

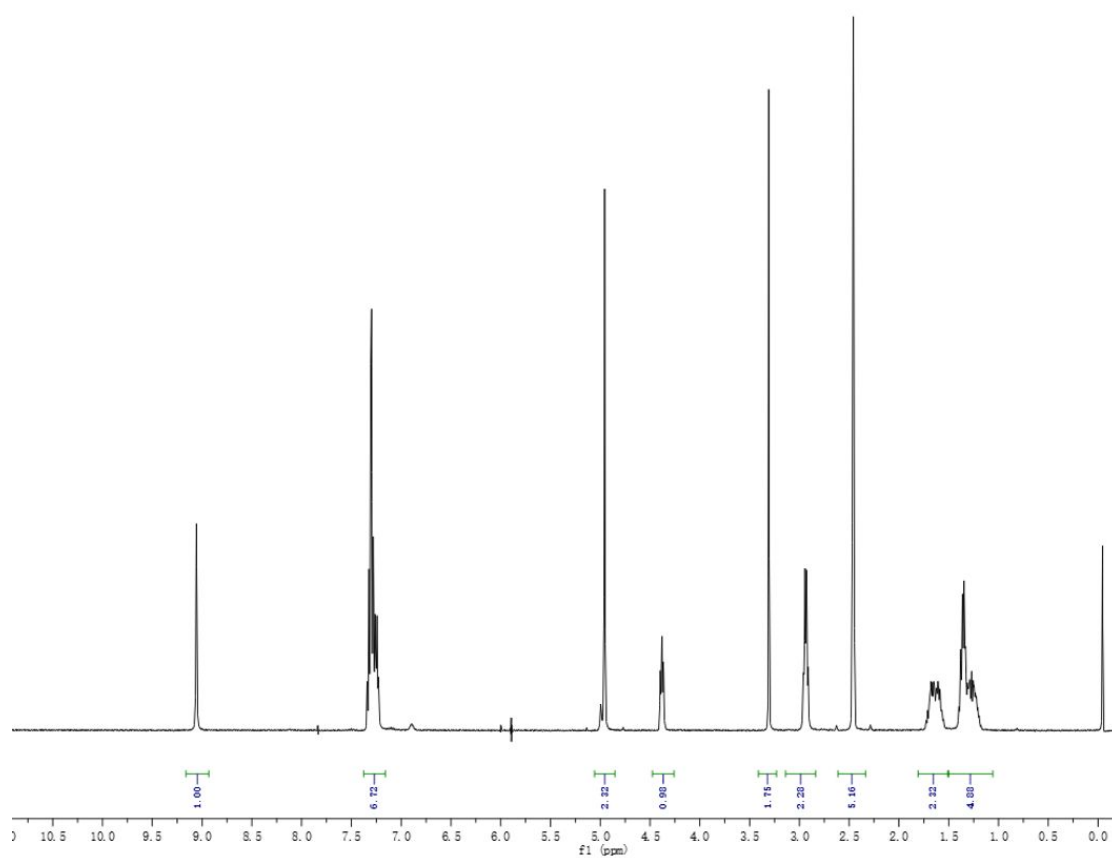

**Figure S1.**  $^1\text{H}$  NMR spectrum of lys(Z)-NCA in  $\text{D}_6\text{-DMSO}$ .

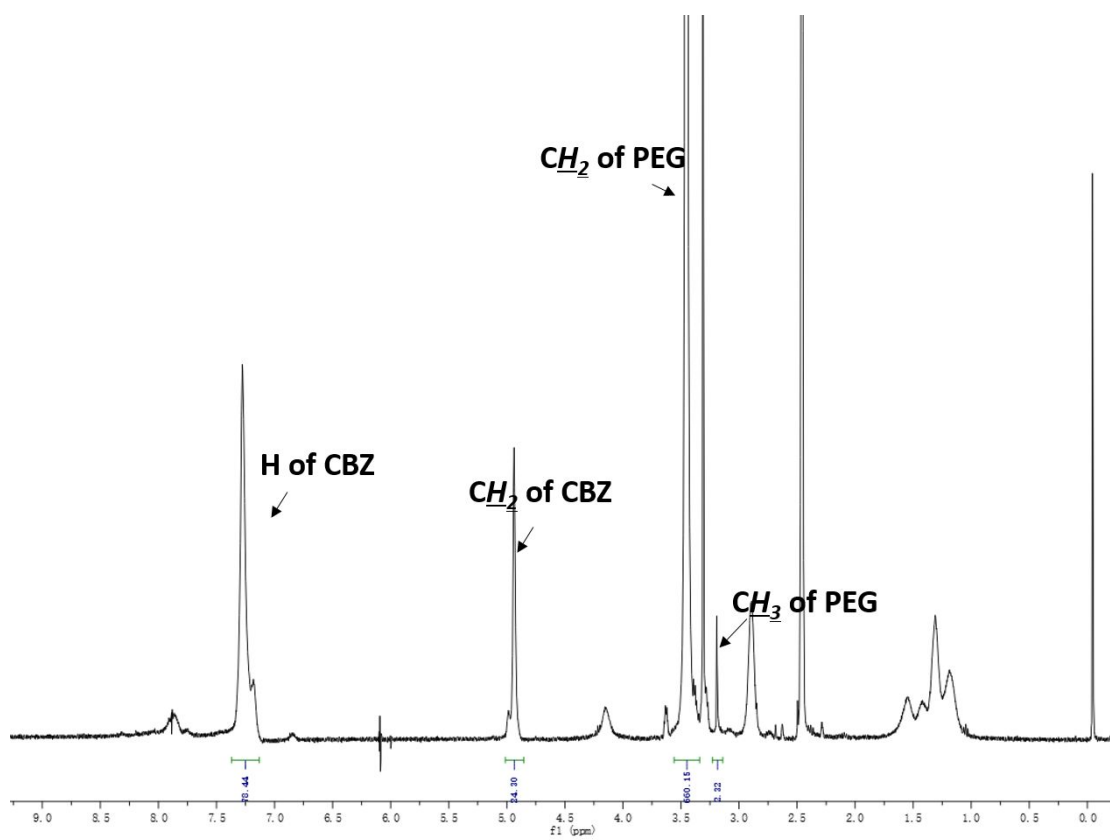

**Figure S2.**  $^1\text{H}$  NMR spectrum of mPEG-*p*(lys(Z))<sub>12</sub> in D<sub>6</sub>-DMSO.

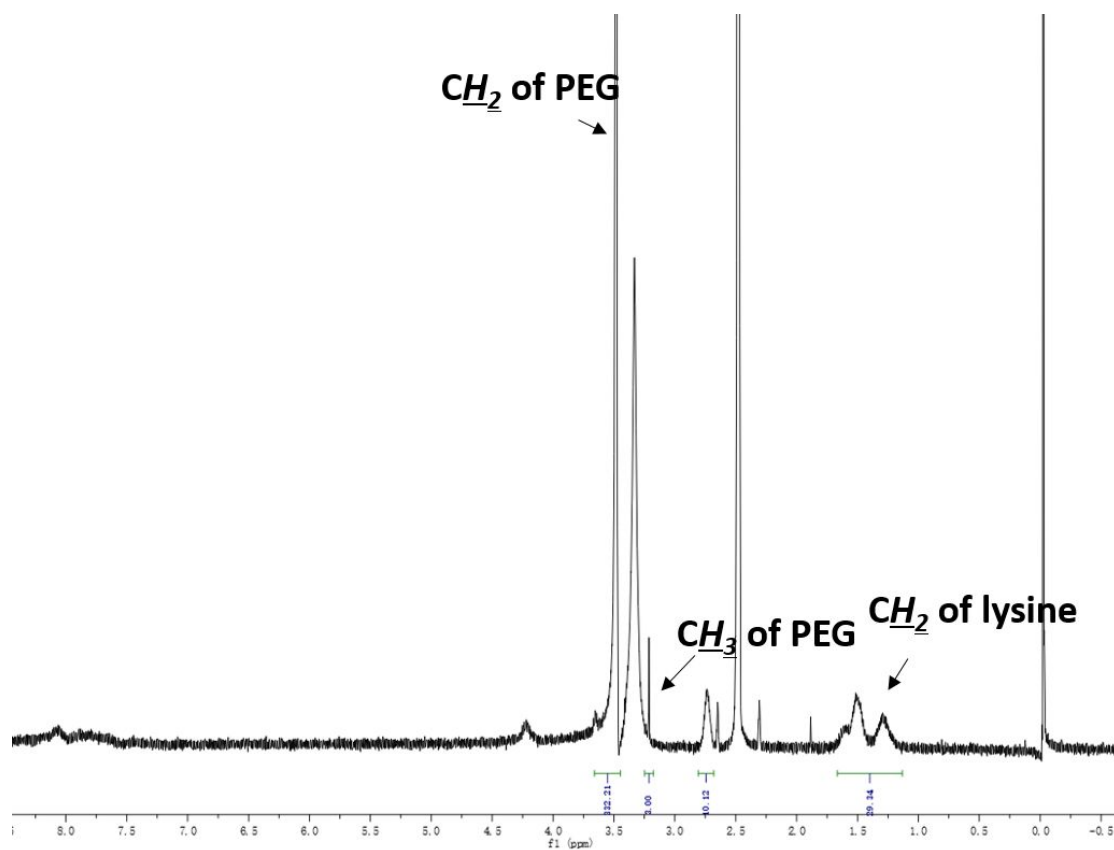

**Figure S3.**  $^1\text{H}$  NMR spectrum of mPEG-*p*(lys)<sub>12</sub> in D<sub>6</sub>-DMSO.

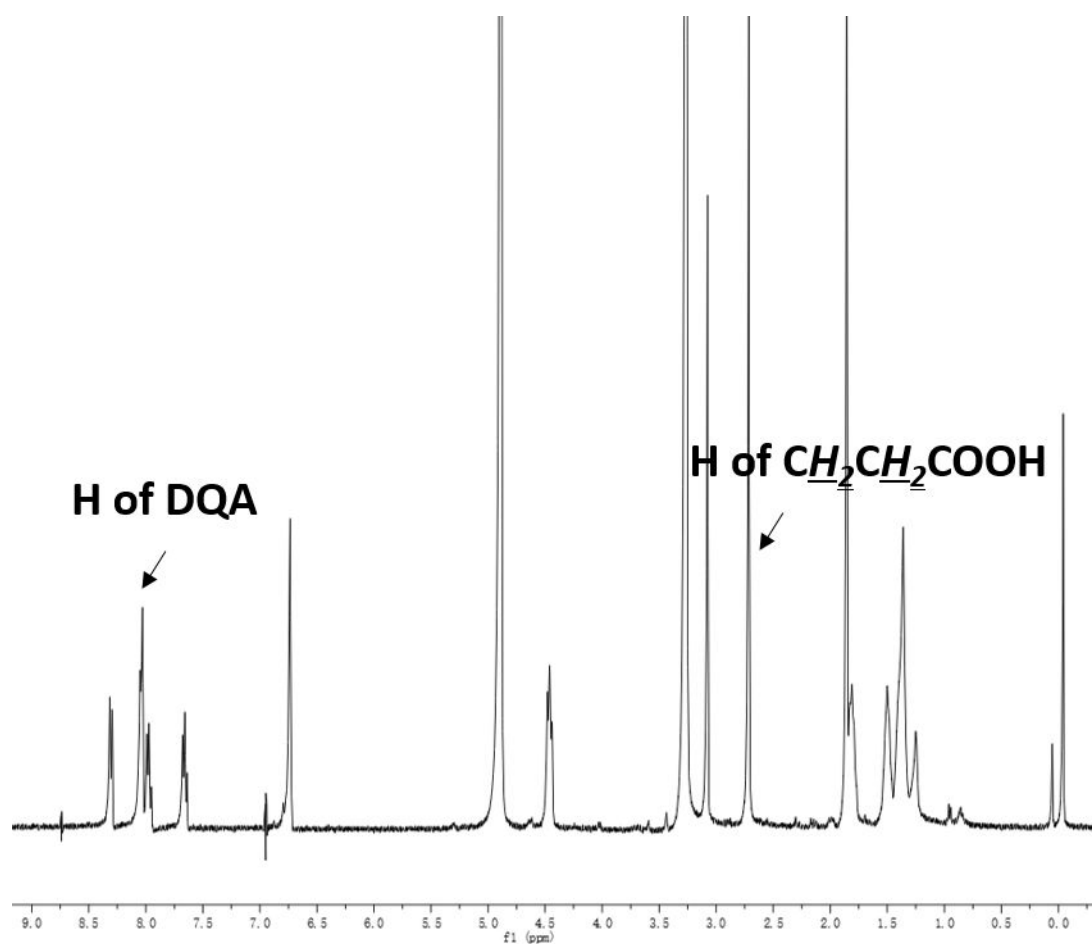

**Figure S4.**  $^1\text{H}$  NMR spectrum of DQA-COOH in MeOD.

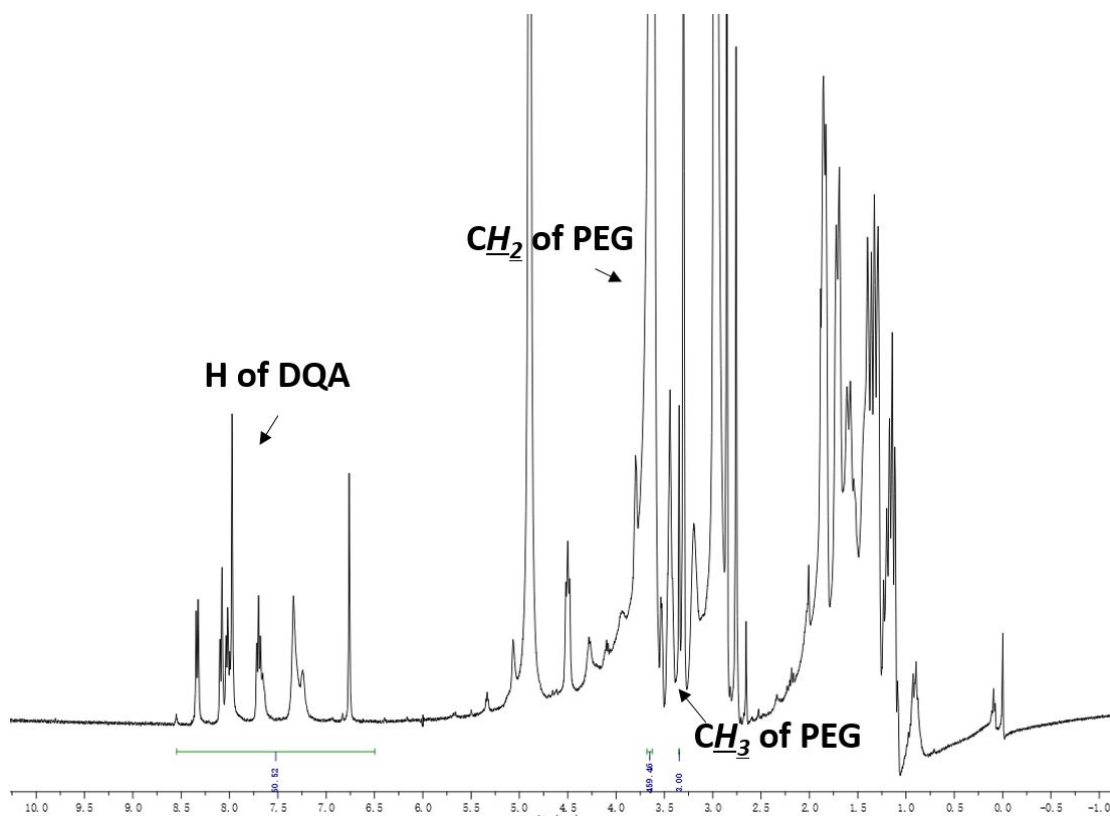

**Figure S5.**  $^1\text{H}$  NMR spectrum of PEG-*p*DQA in D6-DMSO.

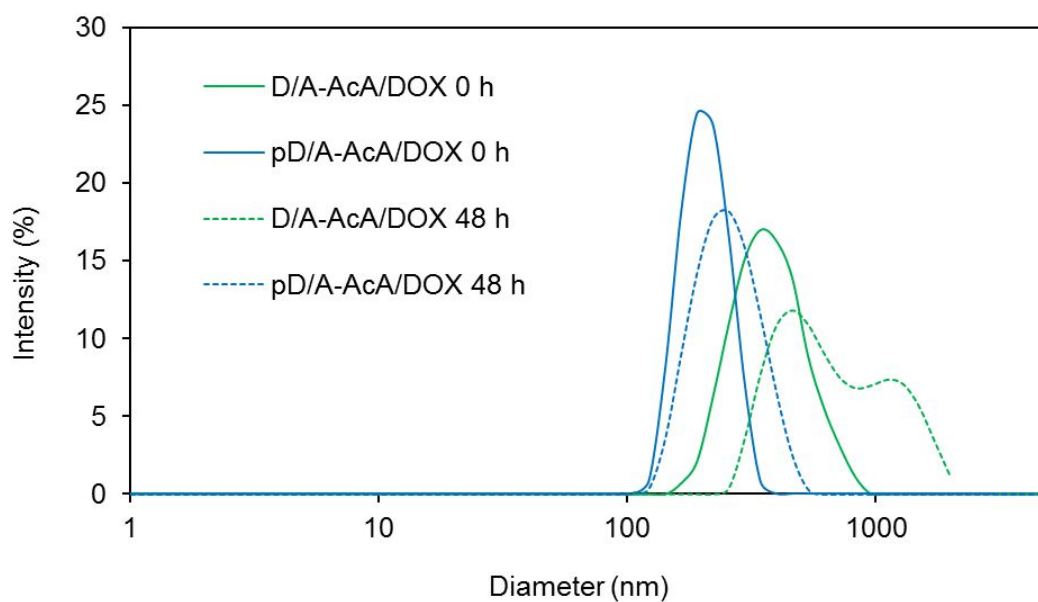

**Figure S6.** The hydrodynamics size distribution of freshly prepared and incubated polyplexes by dynamic light scattering.

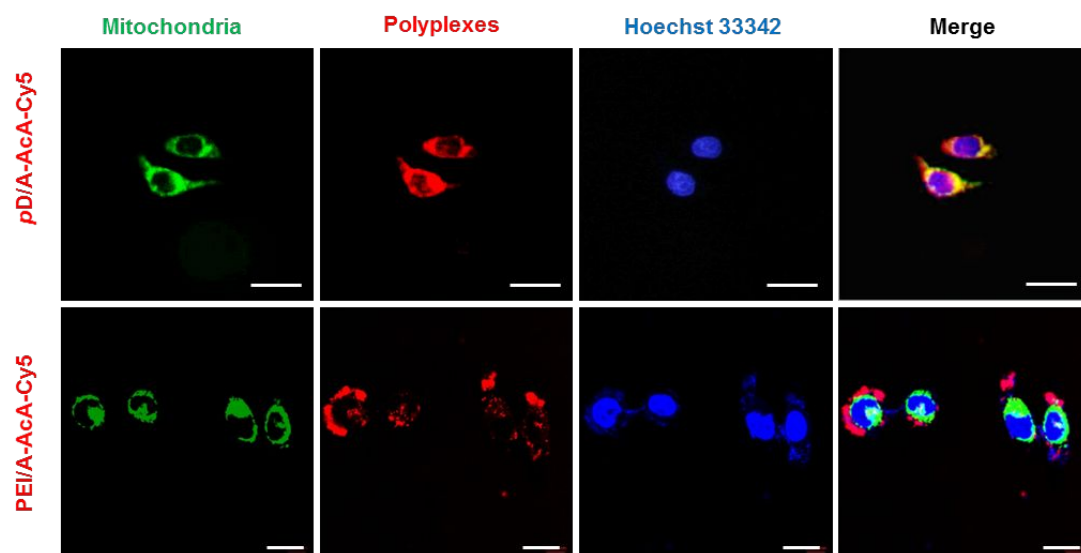

**Figure S7.** Mitochondrial targeting in MCF-7/DOX cells with strong mitochondria staining after treatment with polyplexes for 2 h. Mitochondria were stained by 200 nM Mito-Tracker Green for 30 minutes and then evaluated using fluorescence microscope. Scale bar: 20  $\mu$ m.
